# Supplementary material
Source: PubMed Central journal article supplement (PMC6946379)
Supplement: NIHMS1052488-supplement-Supplemental_Material.pdf [file NIHMS1052488-supplement-Supplemental_Material.pdf]

## **SUPPLEMENTAL MATERIAL**

- I. Supplementary Text**
- II. Supplementary Tables and Figures**
- III. References**

## SUPPLEMENTAL TEXT

### **Supplementary Text: Description of Participating Studies**

The Hispanic Community Health Study/ Study of Latinos (HCHS/SOL) The HCHS/SOL is a multicenter, community-based cohort study of U.S. Hispanics/Latinos (1). Goals of the study are to examine the prevalence of and risk factors for several disorders including heart, lung, blood, and kidney phenotypes. HCHS/SOL investigators sampled 16,415 males and females aged 18-74 years at baseline from four study communities: The Bronx, NY, Chicago, IL, Miami, FL, and San Diego, CA. HCHS/SOL recruitment centers were selected so that the study would include at least 2,000 participants in each of the following designations: Mexican, Puerto Rican, Dominican, Cuban, and Central and South American.

The Multiethnic Study of Atherosclerosis (MESA) MESA was initiated in 2000 to investigate subclinical cardiovascular disease and the risk factors that predict progression to clinically overt cardiovascular disease (2). The population-based cohort included 6,814 asymptomatic males and females aged 45–84 at study baseline from six field centers (Winston-Salem, NC; St. Paul, MN; Chicago, IL; Los Angeles, CA; New York, NY; Baltimore, MD). MESA investigators enrolled participants of Caucasian (38%), African American (28%), Hispanic (22%) and (12%) Chinese descent. The current study was restricted to Hispanics/Latino MESA participants who gave consent for DNA use. ECGs were measured at study baseline.

Women’s Health Initiative Clinical Trial (WHI) The WHI comprises both randomized clinical trials (CT) and an observational study (OS). This study is limited to WHI CT participants, as

ECGs were not collected for WHI OS participants (3). The three WHI clinical trials were designed to allow randomized, controlled evaluation of 1) estrogen with or without progestin treatment, 2) calcium/vitamin D supplementation, and 3) dietary modification on the risk of breast and colorectal cancer, cardiovascular disease, and bone fractures. Between 1993 and 1998, the trials enrolled 68,132 postmenopausal women aged 50–79 years who were followed at 1 of 75 US examination sites (including satellites, remote sites, and their changes in location). Women were ineligible if they had medical conditions predictive of survival time less than 3 years, if they were known to have conditions inconsistent with study participation and adherence, or if they were active participants in another randomized, controlled trial. Those who remained eligible and interested were invited to follow-up examinations at 1, 3, 6, and 9 years. ECGs were measured at study baseline and analyses were restricted and Hispanics/Latino WHI participants. During replication, European descent participants were drawn from the Women’s Health Initiative Memory Study (WHIMS) (4) and African American participants were drawn from the Single Nucleotide Polymorphism (SNP) Health Association Resource Project (SHARe) (5).

### **Supplementary Text: Methods**

Exclusion Criteria: Individuals were excluded based on the following criteria: PR unavailable, poor electrocardiogram (ECG) quality, non-sinus rhythm including atrial fibrillation and atrial flutter on ECG, pacemaker implantation, second or third degree heart block, extreme PR values ( $PR \leq 80$  ms or  $\geq 320$  ms), prevalent heart failure or myocardial infarction, or Wolff-Parkinson-White syndrome on ECG.

Genotyping: Participants were genotyped on the Affymetrix Genome-Wide Human SNP Array 6.0 (MESA, WHI) or an Illumina custom array, consisting of the Illumina Omni 2.5M array (HumanOmni2.5-8v1-1) and approximately 150,000 custom SNPs selected to include ancestry informative markers, variants characteristic of Native American populations, previously identified GWAS loci, and candidate-gene polymorphisms (HCHS/SOL) (6). See below for additional details on quality control metrics in each study. Prior to imputation, study-specific exclusions of genotyped SNPs included SNPs with call rates  $<90\%$  or  $\leq 95\%$  and a minor allele frequency (MAF)  $<1\%$  (Supplemental Table 1). Genotypes were imputed using the 1000 Genomes Phase 1 reference panel (7). SNPs with poor imputation quality (oevar  $< 0.5$ ) were excluded from future analyses in all studies.

*HCHS/SOL Quality Control Procedures*: HCHS/SOL was genotyped on an Illumina custom array. Samples were checked for sex mismatch, gross chromosomal abnormalities, unexpected duplicates, sample call rate  $\geq 99\%$ , contamination, and batch effects. Additionally, SNPs were filtered out if they had Mendelian errors, duplicate-sample discordance, or deviation from Hardy-Weinberg equilibrium (HWE;  $P < 10^{-5}$ ) in a meta-analysis of nine ancestry groups within which individuals had both parents from the same country of origin). SNPs were further excluded if they had positional duplicates or were monomorphic (8).

*MESA Quality Control Procedures*: MESA participants were genotyped on the Affymetrix Genome-Wide Human SNP Array 6.0. Samples were then checked for genotype concordance between SNPs genotyped on the Affymetrix Genome-Wide Human SNP Array 6.0 and SNPs previously genotyped using Sequenom iPLEX. SNPs with a call rate  $< 90\%$ , monomorphic SNPs, and SNPs that mapped to multiple locations were removed. Samples with a call rate  $<$

95% were also removed. Samples were then checked for excess heterozygosity (to identify poor DNA or contamination), sample duplication (using IBD estimates), cryptic relatedness, and sample outliers. HWE was performed and SNPs with  $P < 10^{-6}$  were excluded (9).

*WHI Quality Control Procedures:* WHI participants were genotyped on the Affymetrix Genome-Wide Human SNP Array 6.0. Samples were then excluded if their call rate was <95%, if they were related to another individual (with preference for the retained individual in a related pair going to parent over offspring). SNPs were excluded if they failed HWE ( $P \leq 10^{-6}$ ), had a low call rate (<95%), did not map to a chromosomal location (10).

Statistical Analysis: Genome-wide analyses were performed by each cohort independently across approximately 25 – 39 million SNPs assuming an additive genetic model, using linear regression (MESA, WHI) or linear mixed models (HCHS/SOL) (6). All analyses were adjusted for age, sex, study center or region, height, body mass index, systolic blood pressure, heart rate, beta blocker use, and study principal components of ancestry to maintain consistency with prior PR GWAS (11-17). Furthermore, analyses in HCHS/SOL incorporated estimates of relatedness and sample weights into all analyses and allowed for heterogeneous variance estimates by genetic background group (6). Study specific results were corrected for genomic inflation ( $\lambda$ , Supplemental Figure 1), after which they were combined with inverse-variance weighted meta-analysis conducted in METAL (18). We used a genome-wide significance threshold of  $P < 5 \times 10^{-8}$ . This value reflects a Bonferroni correction whereby 0.05 is divided by 1 million. Due to linkage disequilibrium (LD) across the genome, many SNPs are inherited together and therefore in high correlation with each other. We estimate that after accounting for LD, we have conducted 1 million independent tests, which is therefore used as the denominator in our

Bonferroni correction. For all significant index SNPs, we performed conditional analyses by adjusting for the index SNPs and any subsequently significant SNPs until no remaining genome-wide significant SNPs were identified. Heterogeneity between contributing studies was assessed using Cochran's Q statistic and  $I^2$ .

Generalization of Previously Reported PR SNPs: For SNPs previously associated with PR in published GWAS reports (11, 16), we examined evidence for generalization using the approach described by Sofer *et al.* (19). The method assigns an r-value to every index SNP. The r-values quantify the evidence for replication, controlling for false discovery rate, and are based on the r-values developed by Heller *et al.* (20). Sofer *et al.* extended the r-values to also account for the direction of the observed association. The generalization null hypothesis testing generalization of the PR index SNPs to Hispanics/Latinos was rejected when the r-value was less than 0.05, controlling the false discovery rate of the generalization null hypothesis.

Replication of Novel Associations: For novel associations, we attempted to replicate our results in populations of East Asian, European, and African descent using exclusion criteria and analytic procedures that overlapped with previously described approaches. The European and African descent replication populations were provided by the WHI study (see above for cohort and genotyping information). For the East Asian replication populations, we identified published summary statistics of the association between 2.1 million SNPs (352,228 genotyped SNPs [Affymetrix Genomewide Human SNP Array 5.0] and 1.8 million imputed SNPs [HapMap Phase 2 CHB+JPT reference panel]) and PR provided by Hong *et al.* (14). If an index SNP was not available, we queried the SNAP database for proxy SNPs (21) using an appropriate HapMap2 ethnic population (CEU, AFR, CHB+JPT), an  $r^2$  limit at 0.8, and a distance of 500

kilobases from the index SNP. Here,  $r^2$  represents the correlation between two SNPs in linkage disequilibrium, calculated as follows:

$$r^2 = \frac{D_{AB}^2}{p_A(1 - p_A)p_B(1 - p_B)}$$

where  $D_{AB}^2$  represents the squared disequilibrium coefficient between SNPs A and B (difference between observed and expected allele frequencies),  $p_A$  represents the allele frequency at SNP A, and  $p_B$  represents the allele frequency at SNP B. We used a Bonferroni correction of 0.05/number of statistical tests to determine significance.

Linkage Disequilibrium Analysis: LD was calculated with the  $r^2$  correlation statistic, using the 1000 Genomes meta-populations as reference (AMR, EUR, AFR, and ASN) and visualized using the LocusZoom program. CAFs across global populations were similarly calculated using the four 1000 Genomes reference meta-populations. Additionally, we used RFMix to estimate local ancestry for HCHS/SOL (22). Based on the local ancestry calls, ancestry-specific allele frequencies were estimated for top SNPs using the R/Bioconductor package ASAFE (23).

Bioinformatic Annotation of Associated Variants: For loci associated with PR at a genome-wide significance level in our Hispanic/Latino population, we used epigenetic data from the ENCODE (24) and RoadMap (25) projects to examine evidence of functional annotation using HaploReg v4.1 (26). SNPs correlated with the Hispanic/Latino index SNP at an  $r^2 > 0.8$  were identified using the AMR population and results were restricted to annotation found in available heart tissue (fetal heart, right atrium, and right or left ventricle).

Additionally, for novel variants associated with PR, we queried publically available data from genetic association studies of clinical phenotypes associated with PR (atrial fibrillation, stroke, heart failure) to identify possible associations our novel Hispanic/Latino index SNPs. To identify publically available datasets, the GWAS catalog (27) was queried for published GWAS of atrial fibrillation, stroke, and heart failure. Each published study was examined to identify any with publically posted summary results. Furthermore, dbGap was searched for analyses with atrial fibrillation, stroke, or heart failure in the file name or description. From here, all analysis results from studies with atrial fibrillation, stroke, or heart failure phenotypic outcomes were examined for possible associations with our Hispanic/Latino index signals. Furthermore, because many studies were from older imputation panels (e.g. HapMap imputation panels) and therefore did not contain our index signal for all loci, we identified SNPs in LD with the Hispanic/Latino index SNP using the AMR HapMap2, an  $r^2$  limit at 0.8, and a distance of 500 kilobases from the index SNP using HaploReg v4.1 (26). All SNPs identified were also examined for associations with atrial fibrillation, stroke, and heart failure. We used a Bonferroni correction of  $0.05/\#$  of phenotypes examined (3) to determine significance.



## SUPPLEMENTAL FIGURES AND TABLES

### Supplementary Tables

**Supplemental Table 1.** ECG and genotype measurement methods for Hispanic Community Health Study/Study of Latinos (HCHS/SOL), Multiethnic Study of Atherosclerosis (MESA), and Women’s Health Initiative Clinical Trial (WHI)

| Study                              | HCHS /SOL                                                    | MESA                                                                     | WHI                                                                      |
|------------------------------------|--------------------------------------------------------------|--------------------------------------------------------------------------|--------------------------------------------------------------------------|
| <b>ECG Measurements</b>            |                                                              |                                                                          |                                                                          |
| ECG Machine                        | GE MAC 1200                                                  | GE MAC 1200                                                              | Marquette MAC PC                                                         |
| ECG Measurement System             | GE Marquette 12-SL                                           | GE Marquette 12-SL software (2001 version)                               | Marquette 12SL                                                           |
| <b>Genotype</b>                    |                                                              |                                                                          |                                                                          |
| Array                              | Illumina HumanOmni2.5-8v1-1 + custom content                 | Affymetrix Genome-Wide Human SNP Array 6.0 (Affymetrix, Santa Clara, CA) | Affymetrix Genome-Wide Human SNP Array 6.0 (Affymetrix, Santa Clara, CA) |
| Genotype calling software          | GenomeStudio v2011.1                                         | Birdseed v1.33                                                           | Birdseed                                                                 |
| SNP call rate genotyping exclusion | <98%                                                         | <95%                                                                     | ≤95%                                                                     |
| SNP MAF genotyping exclusion       | NA                                                           | <1%                                                                      | <1%                                                                      |
| SNP MAC genotyping exclusion       | NA                                                           | NA                                                                       | NA                                                                       |
| P HWE genotyping exclusion         | <1e-5                                                        | <1e-6                                                                    | <1e-6                                                                    |
| MAF imputation exclusion           | MAC ≥2 in any of the 4 reference panels (AFR, AMR, ASN, EUR) | 0.01                                                                     | NA                                                                       |
| Imputation quality exclusion       | NA*                                                          | 0.4                                                                      | NA*                                                                      |
| Imputation software                | IMPUTE2                                                      | IMPUTE2                                                                  | MaCH v1.0.16                                                             |
| Build used for Imputation          | 1000 Genomes Phase I release 3 (NCBI build 37 / hg19)        | 1,000 Genomes Phase I integrated variant set (NCBI build 37 / hg19)      | 1,000 Genomes Phase I (NCBI Build 37/ hg19)                              |
| GWAS statistical analysis software | R/Bioconductor GENESIS package                               | SNPTEST2                                                                 | ProbAbel                                                                 |
| Related Individuals?               | Yes                                                          | No                                                                       | No                                                                       |
| Familial Adjustment method         | Kinship coefficients in Mixed model                          | NA                                                                       | NA                                                                       |
| # SNPs measured                    | 2,232,944                                                    | 881666                                                                   | 934,930                                                                  |
| # SNPs imputed                     | 25,568,744                                                   | 39×10 <sup>6</sup>                                                       | 38×10 <sup>6</sup>                                                       |
| # SNPs passing QC                  | 17,322,742                                                   | 8,637,954                                                                | 8,217,098                                                                |

\*No imputation quality filter was applied prior to analysis for HCHS/SOL or WHI. Instead, study-specific results were filtered for effective N which was calculated as follows:  $2 * (\text{Number of Participants}) * (\text{Minor Allele Frequency for SNP of interest}) * (1 - \text{Minor Allele Frequency}) * (\text{Imputation Quality})$ . Only SNPs with effective N > 30 were brought forward for meta-analysis.

**Supplemental Table 2.** Association Results Between Hispanic/Latino PR Interval Index SNPs at *ID2* and Previously Published Genetic Associations with Atrial Fibrillation\*

| SNPs**           | <i>P</i> -values of Association with Phenotype |                                    |
|------------------|------------------------------------------------|------------------------------------|
|                  | Low, <i>et al.</i> (28)                        | Christophersen, <i>et al.</i> (29) |
| <b>rs6730558</b> | 0.77                                           | 0.15                               |
| rs10929547       | 0.77                                           | 0.34                               |
| rs13384855       | 0.79                                           | 0.26                               |
| rs12993630       | 0.64                                           | 0.13                               |
| rs3896594        | 0.58                                           | 0.15                               |

\*Previously published GWAS of stroke and heart failure were also examined. However, no GWAS with publicly available data included rs6730558 or any of the four SNPs in LD with rs6730558. The rs6730558 locus was not present on HapMap imputation panels and there are not yet 1000 Genomes GWAS studies available for stroke or heart failure. Similarly, the above two studies were the only two studies of atrial fibrillation with the r6730558 locus available.

\*\*Hispanic/Latino lead SNP indicated in bold. All other SNPs in locus are in LD ( $r^2 > 0.8$ ) with Hispanic/Latino lead SNP in HapMap2 AMR population

**Supplemental Table 3.** Pairwise Linkage Disequilibrium in International HapMap Populations Between Hispanic Lead SNPs and Previously Published Index SNPs in European (13, 16), African American (11, 17), and Asian Descent (12, 14, 30) Populations at the *SCN5A/SCN10A* Locus Calculated Using Broad Institutes SNP Annotation and Proxy Search (SNAP) (21)

| Hispanic Lead SNP | Previously Published Index SNP | $r^2$ |       |         |
|-------------------|--------------------------------|-------|-------|---------|
|                   |                                | CEU   | YRI   | CHB+JPT |
| rs3922844         | rs7638909 (30)                 | 0.05  | 0.01  | 0       |
|                   | rs11708996 (16)                | 0.07  | NA    | 0.003   |
|                   | rs6599222 (17)                 | 0.001 | 0.24  | 0.001   |
|                   | rs6763048 (11)                 | 0.003 | 0.02  | NA      |
|                   | rs6795970 (12, 13)             | 0.001 | 0.02  | 0.004   |
|                   | rs6800541 (12, 14, 16)         | 0.01  | NA    | 0.007   |
|                   | rs6798015 (17)                 | 0.02  | 0.001 | 0.001   |
|                   | rs6599257 (12)                 | 0.04  | 0.01  | 0.01    |
| rs7374004         | rs7638909                      | 0.02  | NA    | 0.01    |
|                   | rs11708996                     | 0.18  | NA    | 0.01    |
|                   | rs6599222                      | 0.15  | NA    | 0.006   |
|                   | rs6763048                      | 0.006 | NA    | NA      |
|                   | rs6795970                      | 0.01  | NA    | 0.01    |
|                   | rs6800541                      | 0.02  | NA    | 0.006   |
|                   | rs6798015                      | 0.02  | NA    | 0       |
|                   | rs6599257                      | 0.09  | NA    | 0.01    |
| rs45567533        | rs7638909                      | 0.02  | NA    | 0.01    |
|                   | rs11708996                     | 0     | NA    | 0.004   |
|                   | rs6599222                      | 0.01  | NA    | 0.04    |
|                   | rs6763048                      | 0.01  | NA    | NA      |
|                   | rs6795970                      | 0.04  | NA    | 0.004   |
|                   | rs6800541                      | 0.04  | NA    | 0.01    |
|                   | rs6798015                      | 0.08  | NA    | 0       |
|                   | rs6599257                      | 0.11  | NA    | 0.004   |
| rs6801957         | rs7638909                      | 0.12  | 0.01  | 0       |

|            |      |      |      |
|------------|------|------|------|
| rs11708996 | 0.07 | NA   | 0    |
| rs6599222  | 0.05 | 0.05 | 0.02 |
| rs6763048  | 0.05 | 0.02 | NA   |
| rs6795970  | 0.93 | 0.07 | 0.64 |
| rs6800541  | 0.97 | NA   | 0.65 |
| rs6798015  | 0.83 | 0.51 | 0.87 |
| rs6599257  | 0.67 | 0.14 | 0.54 |

Abbreviations: CEU, HapMap population of Utah residents with Northern and Western European ancestry; CHB, HapMap population of Han Chinese in Beijing, China; JPT, HapMap population of Japanese in Tokyo, Japan; NA, Not applicable;  $r^2$ , measure of linkage disequilibrium (0: not correlated, 1: SNPs inherited together, complete correlation); SNP, Single nucleotide polymorphism; YRI, HapMap population of Yoruba in Ibadan, Nigeria

**Supplemental Table 4.** Generalization of ten loci (15 index SNPs) associated with PR interval in European descent and African American populations, controlling for False Discovery Rate

| SNP                           | Locus            | CA/NCA | Previously Published Beta (SE) | Previously Published <i>P</i> -value | R-value* |
|-------------------------------|------------------|--------|--------------------------------|--------------------------------------|----------|
| <b>African Americans (11)</b> |                  |        |                                |                                      |          |
| rs3891585                     | <i>MEIS1</i>     | A/G    | 2.13 (0.31)                    | 1.42E-11                             | 3.71E-05 |
| rs267567                      | <i>ITGA9</i>     | A/G    | 2.73 (0.41)                    | 4.14E-11                             | 2.78E-03 |
| rs3922844                     | <i>SCN5A</i>     | T/C    | -4.54 (0.33)                   | 5.26E-43                             | 2.99E-37 |
| rs11732231                    | <i>ARHGAP24</i>  | C/G    | 2.28 (0.39)                    | 2.96E-09                             | 3.37E-04 |
| rs11773845                    | <i>CAVI-CAV2</i> | A/C    | -2.29 (0.33)                   | 4.45E-12                             | 1.27E-06 |
| rs1895585                     | <i>TBX5/TBX3</i> | A/G    | 3.19 (0.35)                    | 1.36E-19                             | 1.81E-04 |
| <b>European Descent (16)</b>  |                  |        |                                |                                      |          |
| rs11897119                    | <i>MEIS1</i>     | C/T    | 1.36 (0.21)                    | 4.62E-11                             | 5.15E-05 |
| rs11708996                    | <i>SCN5A</i>     | C/G    | 3.04 (0.29)                    | 6.00E-26                             | 1.50E-20 |
| rs6800541                     | <i>SCN10A</i>    | C/T    | 3.77 (0.21)                    | 2.10E-74                             | 2.31E-42 |
| rs7692808                     | <i>ARHGAP24</i>  | A/G    | -2.01 (0.22)                   | 5.99E-20                             | 1.52E-09 |
| rs251253                      | <i>NKX2-5</i>    | C/T    | -1.49 (0.21)                   | 9.45E-13                             | 5.50E-05 |
| rs3807989                     | <i>CAVI-CAV2</i> | A/G    | 2.30 (0.21)                    | 3.66E-28                             | 7.48E-18 |
| rs4944092                     | <i>WNT11</i>     | G/A    | -1.19 (0.29)                   | 3.22E-08                             | 3.49E-01 |
| rs11047543                    | <i>SOX5</i>      | A/G    | -2.09 (0.29)                   | 3.34E-13                             | 3.34E-08 |
| rs1896312                     | <i>TBX5/TBX3</i> | C/T    | 1.95 (0.23)                    | 3.13E-17                             | 1.03E-02 |

Abbreviations: CA, Coded Allele; NCA, Non-Coded Allele; SE, Standard Error; SNP, Single Nucleotide Polymorphism

\* The approach described by Sofer and colleagues assigns an r-value to every index SNP. (19) The generalization null hypothesis testing generalization of the PR index SNPs to Hispanics/Latinos was rejected when the r-value was less than 0.05, controlling the false discovery rate of the generalization null hypothesis.

**Supplemental Table 5.** Bioinformatic characterization of seven index signals associated with PR interval in Hispanics/Latino Population

| Locus            | Lead<br>Hispanics/Latino<br>o SNP | Chromatin State <sup>a</sup> |                 |                   |                    | H3K4me1 <sup>b</sup> | H3K4me3 <sup>c</sup> | H3K27ac <sup>d</sup> | H3K9ac <sup>e</sup> | DNase |
|------------------|-----------------------------------|------------------------------|-----------------|-------------------|--------------------|----------------------|----------------------|----------------------|---------------------|-------|
|                  |                                   | Fetal<br>Heart               | Right<br>Atrium | Left<br>Ventricle | Right<br>Ventricle |                      |                      |                      |                     |       |
| <i>ID2</i>       | rs6730558                         | PromP                        | EnhW2           |                   |                    | FH, RA,<br>LV, RV    | FH                   | RA, RV               | FH                  | Y     |
| <i>SLC8A1</i>    | rs17026148                        |                              |                 |                   |                    |                      |                      |                      |                     | N     |
| <i>SCN5A</i>     | rs3922844                         | EnhA2                        |                 | EnhAc             | EnhAc              | FH, RA,<br>LV, RV    | FH                   | RA, LV,<br>RV        | FH                  | N     |
| <i>SCN10A</i>    | rs6801957                         | EnhA1                        | EnhAc           | EnhW2             | EnhAc              | FH, RA,<br>LV, RV    | FH                   | RA, LV,<br>RV        | FH                  | Y     |
| <i>ARHGAP24</i>  | rs13105921                        | EnhW1                        | PromP           |                   | PromP              | FH, RV               | RA, RV               | LV                   | FH                  | N     |
| <i>CAV1-CAV2</i> | rs3807989                         | TxEnh5                       | EnhAF           | TxEnh5            | TxEnh5             | FH, RA,<br>LV, RV    | FH                   | RA, LV,<br>RV        | FH                  | Y     |
| <i>SOX5</i>      | rs146974314                       |                              |                 |                   |                    |                      |                      |                      |                     | N     |

Abbreviations: FH, Fetal Heart; LV, Left Ventricle; N, No DNase Hypersensitivity; RA, Right Atrium; RV, Right Ventricle; SNP, Single Nucleotide Polymorphism; Y, DNase Hypersensitivity Present

<sup>a</sup>Chromatin states based on 25-state model. The following chromatin states were found for the investigated loci: PromP, Poised Promoter; EnhA2, Active Enhancer 2; EnhA1, Active Enhancer 1; TxEnh5, Transcribed 5' Preferential and Enhancer; EnhW2, Weak Enhancer 2; EnhAc, Primary H3K27ac Possible Enhancer; and EnhAF, Active Enhancer Flank.

<sup>b</sup>H3K4me1 is a mark of regulatory elements associated with enhancers and other distal elements but also enriched downstream of transcription starts. Evidence of epigenetic modification was examined in Fetal Heart tissue (FH), Right Atrium tissue (RA), Left Ventricle tissue (LV), and Right Ventricle tissue (RV).

<sup>c</sup>H3K4me3 is a mark of regulatory elements primarily associated with promoters/transcription starts. Evidence of epigenetic modification was examined in Fetal Heart tissue (FH), Right Atrium tissue (RA), Left Ventricle tissue (LV), and Right Ventricle tissue (RV).

<sup>d</sup>H3K27ac is a mark of active regulatory elements and may distinguish active enhancers and promoters from inactive counterparts. Evidence of epigenetic modification was examined in Fetal Heart tissue (FH), Right Atrium tissue (RA), Left Ventricle tissue (LV), and Right Ventricle tissue (RV).

<sup>e</sup>H3K9ac is a mark of active regulatory elements with preference for promoters. Evidence of epigenetic modification was examined in Fetal Heart tissue (FH), Right Atrium tissue (RA), Left Ventricle tissue (LV), and Right Ventricle tissue (RV)

## Supplementary Figures

**Supplementary Figure 1.** Study-specific (Panels A-C) and meta-analysis (Panel D) quantile-quantile plots of P-values for estimates of association between single nucleotide polymorphisms and PR interval. Hispanic Community Health Study/Study of Latinos (HCHS/SOL); Multiethnic Study of Atherosclerosis (MESA); Women's Health Initiative Clinical Trial (WHI CT)

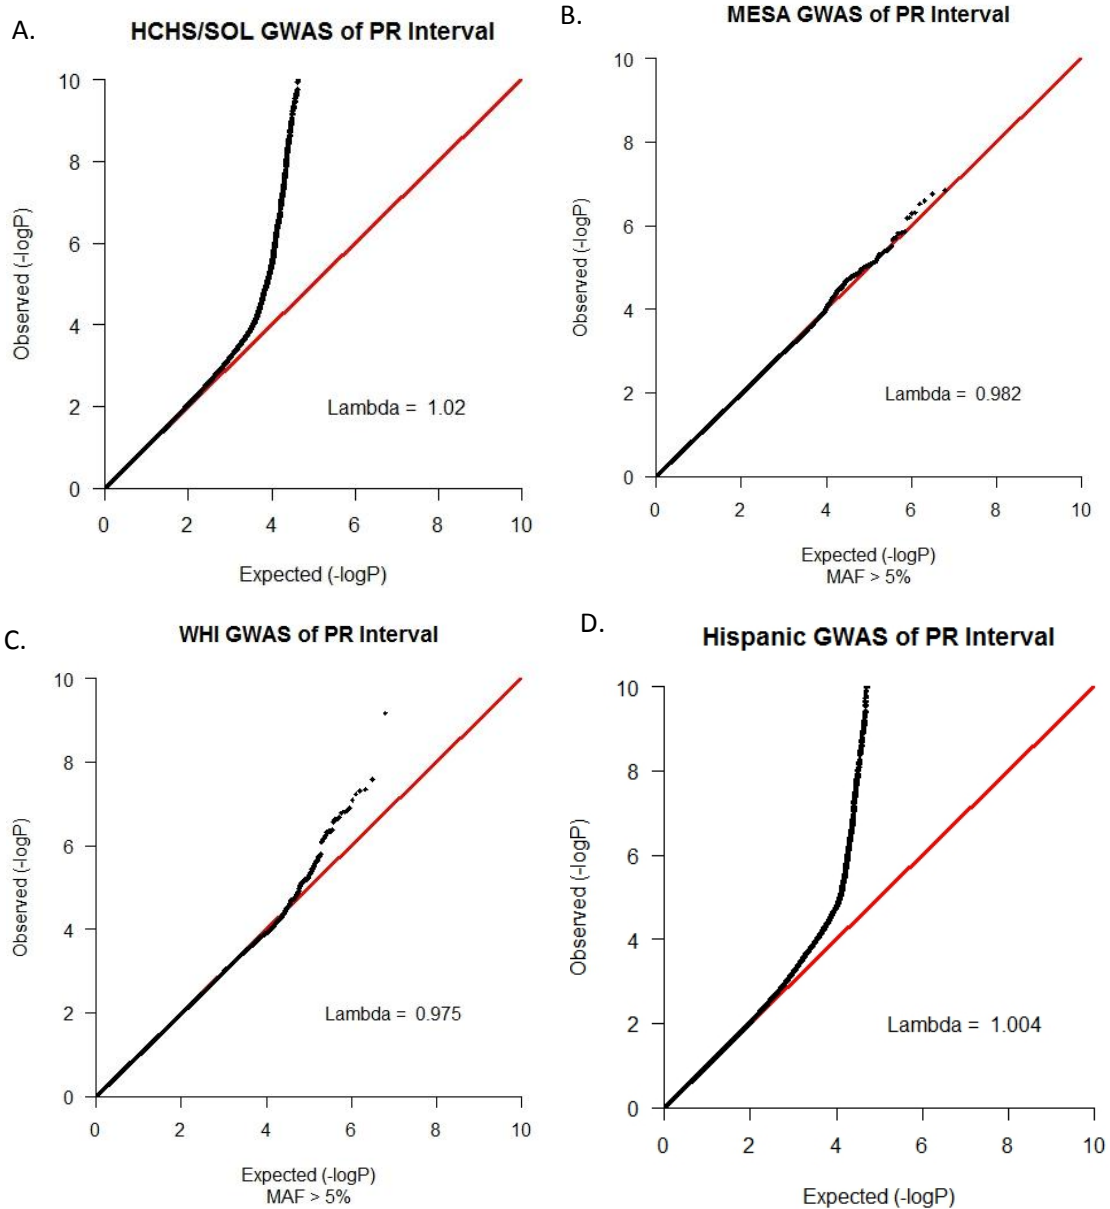



**Supplemental Figure 2.** LocusZoom plots of common (coded allele frequency > 0.05) single nucleotide polymorphisms at four regions (*SCN5A*, *SCN10A*, *CAVI-CAV2*, *ARHGAP24*) associated with PR interval in Hispanics/Latino populations. Results from the genome-wide association study meta-analysis in Hispanics/Latinos is plotted on linkage disequilibrium patterns calculated using 1000 Genomes meta-populations representing admixed American (AMR), European (EUR), African (AFR), and East Asian (ASN) populations

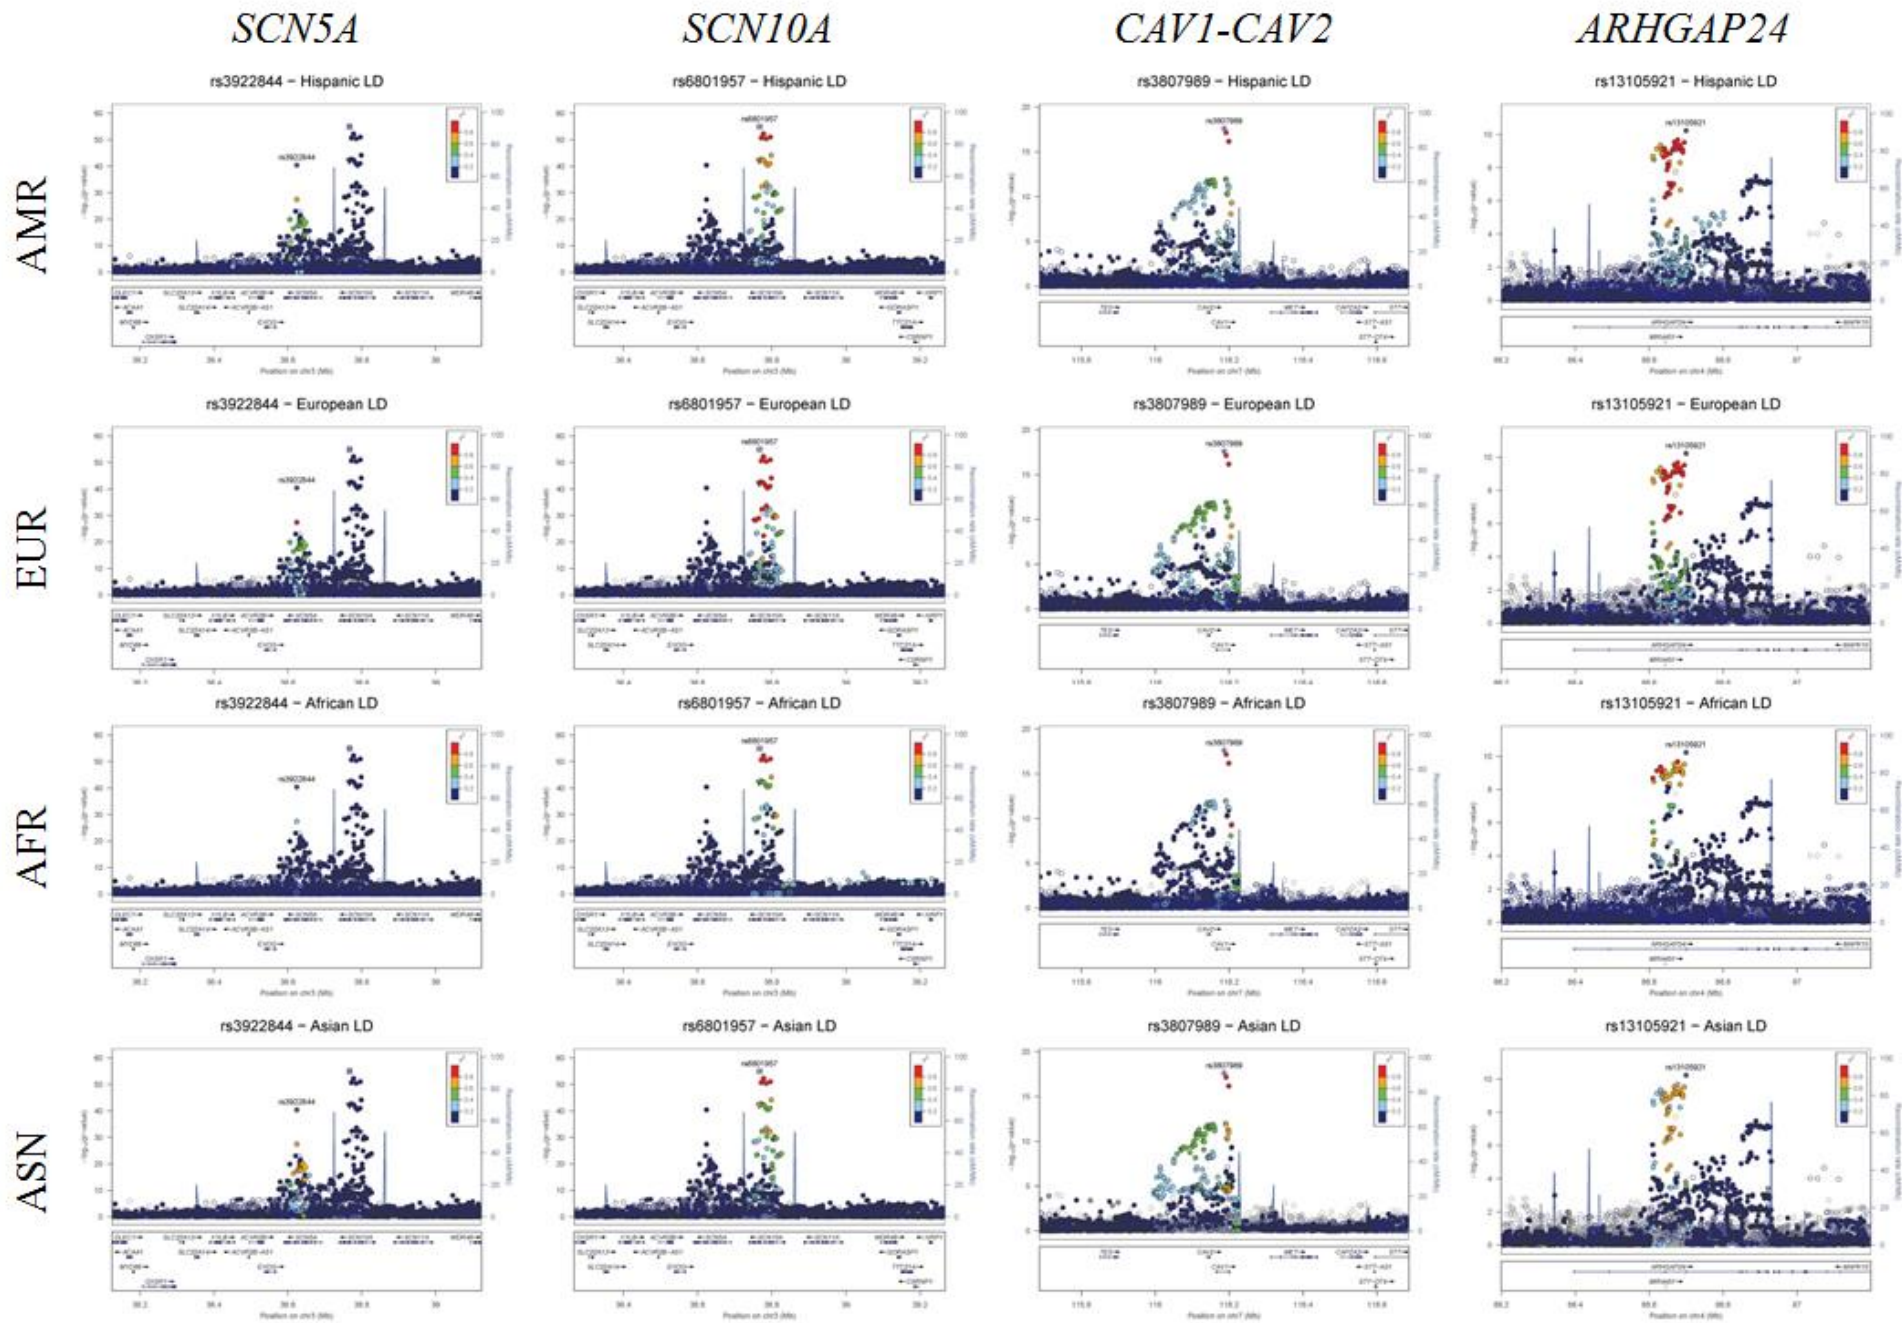

**Supplemental Figure 3.** Generalization of Ten Loci Associated with PR in European Descent or African American Populations to Hispanics/Latinos, Controlling for False Discovery Rate. Dark blue bars represent the confidence intervals for the beta estimates of the PR associated loci in European descent populations according to Pfeufer *et al.* (Panel A) (16) or Butler *et al.* (Panel B) (11) that generalized to Hispanics/Latinos (light blue bars). The red stars correspond to those lead SNPs in Hispanics/Latinos that reached genome-wide significance ( $P < 5 \times 10^{-8}$ ). Red bars represent the confidence interval for the beta estimates of those loci associated with European descent or African American populations (dark red) that did not generalize to Hispanics/Latinos (orange red).

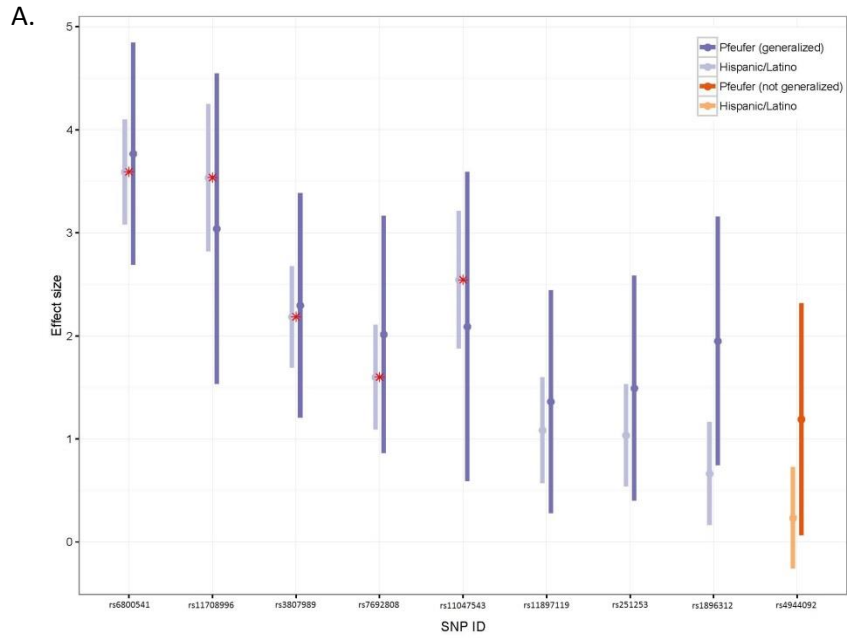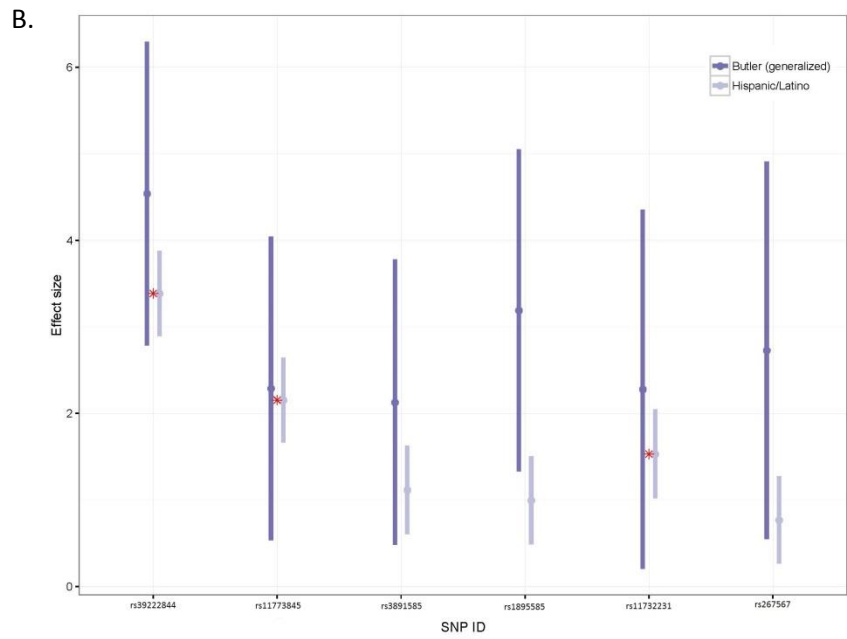

## REFERENCES

- 1 Sorlie, P.D., Aviles-Santa, L.M., Wassertheil-Smoller, S., Kaplan, R.C., Daviglius, M.L., Giachello, A.L., Schneiderman, N., Raij, L., Talavera, G., Allison, M. *et al.* (2010) Design and implementation of the Hispanic Community Health Study/Study of Latinos. *Annals of epidemiology*, **20**, 629-641.
- 2 Bild, D.E., Bluemke, D.A., Burke, G.L., Detrano, R., Diez Roux, A.V., Folsom, A.R., Greenland, P., Jacob, D.R., Jr., Kronmal, R., Liu, K. *et al.* (2002) Multi-ethnic study of atherosclerosis: objectives and design. *American journal of epidemiology*, **156**, 871-881.
- 3 WHI Study Group. (1998) Design of the Women's Health Initiative clinical trial and observational study. The Women's Health Initiative Study Group. *Control Clin Trials*, **19**, 61-109.
- 4 Shumaker, S.A., Reboussin, B.A., Espeland, M.A., Rapp, S.R., McBee, W.L., Dailey, M., Bowen, D., Terrell, T. and Jones, B.N. (1998) The Women's Health Initiative Memory Study (WHIMS): a trial of the effect of estrogen therapy in preventing and slowing the progression of dementia. *Controlled clinical trials*, **19**, 604-621.
- 5 SNP Health Association Resource Project. *U.S. Department of Health & Human Services: National Institutes of Health. National Heart, Lung and Blood Institute.* <https://www.nhlbi.nih.gov/resources/geneticsgenomics/programs/share.htm>. Accessed January 28 2016, in press.
- 6 Conomos, M.P., Laurie, C.A., Stilp, A.M., Gogarten, S.M., McHugh, C.P., Nelson, S.C., Sofer, T., Fernandez-Rhodes, L., Justice, A.E., Graff, M. *et al.* (2016) Genetic Diversity and Association Studies in US Hispanic/Latino Populations: Applications in the Hispanic Community Health Study/Study of Latinos. *American journal of human genetics*, **98**, 165-184.
- 7 Genomes Project Consortium, Abecasis, G.R., Altshuler, D., Auton, A., Brooks, L.D., Durbin, R.M., Gibbs, R.A., Hurles, M.E. and McVean, G.A. (2010) A map of human genome variation from population-scale sequencing. *Nature*, **467**, 1061-1073.
- 8 Conomos, Matthew P., Laurie, Cecelia A., Stilp, Adrienne M., Gogarten, Stephanie M., McHugh, Caitlin P., Nelson, Sarah C., Sofer, T., Fernández-Rhodes, L., Justice, Anne E., Graff, M. *et al.* (2016) Genetic Diversity and Association Studies in US Hispanic/Latino Populations: Applications in the Hispanic Community Health Study/Study of Latinos. *Am. J. Hum. Genet.*, **98**, 165-184.
- 9 Lettre, G., Palmer, C.D., Young, T., Ejebe, K.G., Allayee, H., Benjamin, E.J., Bennett, F., Bowden, D.W., Chakravarti, A., Dreisbach, A. *et al.* (2011) Genome-Wide Association Study of Coronary Heart Disease and Its Risk Factors in 8,090 African Americans: The NHLBI CARE Project. *PLOS Genetics*, **7**, e1001300.
- 10 Velez Edwards, D.R., Naj, A.C., Monda, K., North, K.E., Neuhaus, M., Magvanjav, O., Kusimo, I., Vitolins, M.Z., Manson, J.E., O'Sullivan, M.J. *et al.* (2013) Gene-environment interactions and obesity traits among postmenopausal African-American and Hispanic women in the Women's Health Initiative SHARe Study. *Human Genetics*, **132**, 323-336.
- 11 Butler, A.M., Yin, X., Evans, D.S., Nalls, M.A., Smith, E.N., Tanaka, T., Li, G., Buxbaum, S.G., Whitsel, E.A., Alonso, A. *et al.* (2012) Novel loci associated with PR interval in a genome-wide association study of 10 African American cohorts. *Circulation. Cardiovascular genetics*, **5**, 639-646.
- 12 Chambers, J.C., Zhao, J., Terracciano, C.M.N., Bezzina, C.R., Zhang, W., Kaba, R., Navaratnarajah, M., Lotlikar, A., Sehmi, J.S., Kooner, M.K. *et al.* (2010) Genetic variation in SCN10A influences cardiac conduction. *Nat Genet*, **42**, 149-152.
- 13 Holm, H., Gudbjartsson, D.F., Arnar, D.O., Thorleifsson, G., Thorgeirsson, G., Stefansdottir, H., Gudjonsson, S.A., Jonasdottir, A., Mathiesen, E.B., Njolstad, I. *et al.* (2010) Several common variants modulate heart rate, PR interval and QRS duration. *Nat Genet*, **42**, 117-122.

- 14 Hong, K.W., Lim, J.E., Kim, J.W., Tabara, Y., Ueshima, H., Miki, T., Matsuda, F., Cho, Y.S., Kim, Y. and Oh, B. (2014) Identification of three novel genetic variations associated with electrocardiographic traits (QRS duration and PR interval) in East Asians. *Hum Mol Genet*, **23**, 6659-6667.
- 15 Newton-Cheh, C., Guo, C.-Y., Wang, T., O'Donnell, C., Levy, D. and Larson, M. (2007) Genome-wide association study of electrocardiographic and heart rate variability traits: the Framingham Heart Study. *BMC Medical Genetics*, **8**, S7.
- 16 Pfeufer, A., van Noord, C., Marciante, K.D., Arking, D.E., Larson, M.G., Smith, A.V., Tarasov, K.V., Muller, M., Sotoodehnia, N., Sinner, M.F. *et al.* (2010) Genome-wide association study of PR interval. *Nat Genet*, **42**, 153-159.
- 17 Smith, J.G., Magnani, J.W., Palmer, C., Meng, Y.A., Soliman, E.Z., Musani, S.K., Kerr, K.F., Schnabel, R.B., Lubitz, S.A., Sotoodehnia, N. *et al.* (2011) Genome-Wide Association Studies of the PR Interval in African Americans. *PLoS Genet*, **7**, e1001304.
- 18 Willer, C.J., Li, Y. and Abecasis, G.R. (2010) METAL: fast and efficient meta-analysis of genomewide association scans. *Bioinformatics*, **26**, 2190-2191.
- 19 Sofer, T.H., Bogomolov, M., Avery, C.L., Graff, M., North, K.E., Reiner, A., Thornton, T.A., Rice, K., Benjamini, Y., Laurie, C.C. *et al.* (2016) A Powerful Statistical Framework for Generalization Testing in GWAS, with Application to the HCHS/SOL. *UW Biostatistics Working Paper Series*, in press.
- 20 Heller, R., Bogomolov, M. and Benjamini, Y. (2014) Deciding whether follow-up studies have replicated findings in a preliminary large-scale omics study. *Proceedings of the National Academy of Sciences*, **111**, 16262-16267.
- 21 Johnson, A.D., Handsaker, R.E., Pulit, S.L., Nizzari, M.M., O'Donnell, C.J. and de Bakker, P.I.W. (2008) SNAP: a web-based tool for identification and annotation of proxy SNPs using HapMap. *Bioinformatics*, **24**, 2938-2939.
- 22 Browning, S.R., Grinde, K., Plantinga, A., Gogarten, S.M., Stilp, A.M., Kaplan, R.C., Avilés-Santa, M.L., Browning, B.L. and Laurie, C.C. (2016) Local Ancestry Inference in a Large US-Based Hispanic/Latino Study: Hispanic Community Health Study/Study of Latinos (HCHS/SOL). *G3: Genes/Genomes/Genetics*, **6**, 1525-1534.
- 23 Zhang, Q.S., Browning, B.L. and Browning, S.R. (2016) ASAFE: ancestry-specific allele frequency estimation. *Bioinformatics*, **32**, 2227-2229.
- 24 ENCODE Project Consortium. (2011) A user's guide to the encyclopedia of DNA elements (ENCODE). *PLoS biology*, **9**, e1001046.
- 25 Romanoski, C.E., Glass, C.K., Stunnenberg, H.G., Wilson, L. and Almouzni, G. (2015) Epigenomics: Roadmap for regulation. *Nature*, **518**, 314-316.
- 26 Ward, L.D. and Kellis, M. (2011) HaploReg: a resource for exploring chromatin states, conservation, and regulatory motif alterations within sets of genetically linked variants. *Nucleic acids research*, in press.
- 27 MacArthur, J., Bowler, E., Cerezo, M., Gil, L., Hall, P., Hastings, E., Junkins, H., McMahon, A., Milano, A., Morales, J. *et al.* (2017) The new NHGRI-EBI Catalog of published genome-wide association studies (GWAS Catalog). *Nucleic Acids Research*, **45**, D896-D901.
- 28 Low, S.-K., Takahashi, A., Ebana, Y., Ozaki, K., Christophersen, I.E., Ellinor, P.T., Consortium, A., Ogishima, S., Yamamoto, M., Satoh, M. *et al.* (2017) Identification of six new genetic loci associated with atrial fibrillation in the Japanese population. *Nature genetics*, **49**, 953-958.
- 29 Christophersen, I.E., Rienstra, M., Roselli, C., Yin, X., Geelhoed, B., Barnard, J., Lin, H., Arking, D.E., Smith, A.V., Albert, C.M. *et al.* (2017) Large-scale analyses of common and rare variants identify 12 new loci associated with atrial fibrillation. *Nat Genet*, **49**, 946-952.

30 Smith, J.G., Lowe, J.K., Kovvali, S., Maller, J.B., Salit, J., Daly, M.J., Stoffel, M., Altshuler, D.M., Friedman, J.M., Breslow, J.L. *et al.* (2009) Genome-wide association study of electrocardiographic conduction measures in an isolated founder population: Kosrae. *Heart Rhythm*, **6**, 634-641.
